# Supplementary material
Source: Springer Nature journal article supplement (https://www.springermedizin.de/resource/supplementary/12961_2009_146_MOESM3_ESM.pdf/9571538)
Supplement: MOESM3 [file 9571538]

1. Must measure similar implementation aspects to a set of programme elements so that, by measuring the tracer, it is possible to deduce the performance of the other elements.
2. Must be an important part of the programme. (Focused was on what was essential rather than what was “nice to know”.)
3. Must be realistic in terms of what is current best practice or eminently possible in HIV and TB programmes.
4. As far as possible, must be consistent with national and provincial guidelines.
5. Must be possible to measure in a valid, reliable and interpretable way
6. Must give information that can be used to improve the management of the HIV/TB/STI programme at district level, as well as regionally and provincially
7. Preference is given to indicators that can be drawn from current routine monitoring systems or that can be incorporated into such systems without undue burden to staff involved in the collection of routine data.
